# Supplementary material for: A flexible porous Cu(ii) bis-imidazolate framework with ultrahigh concentration of active sites for efficient and recyclable CO2 capture
Source: Royal Society of Chemistry journal article supplement (doi:10.1039/c3cc46597g), 2013-01-01
Supplement: c3cc46597g.pdf [file c3cc46597g.pdf]

Supporting Information for

**A flexible porous Cu(II) bis-imidazolate framework with ultrahigh concentration of active sites for efficient and recyclable CO<sub>2</sub> capture**

Dong-Dong Zhou, Chun-Ting He, Pei-Qin Liao, Wei Xue, Wei-Xiong Zhang, Hao-Long Zhou, Jie-Peng Zhang\* and Xiao-Ming Chen

*MOE Key Laboratory of Bioinorganic and Synthetic Chemistry, KLGHEI of Environment and Energy Chemistry, School of Chemistry & Chemical Engineering, Sun Yat-Sen University, Guangzhou 510275, P. R. China.*

\*E-mail: zhangjp7@mail.sysu.edu.cn

## Supplementary Index

### Experimental details.

**Calculation of isosteric heat of adsorption ( $Q_{st}$ ).**

**Calculation of CO<sub>2</sub>/N<sub>2</sub> selectivities.**

**Table S1.** Crystallographic data and structure refinement results.

**Fig. S1.** PXRD patterns of solid samples obtained by different reaction methods.

**Fig. S2.** The coordination environments in **1** and **2**.

**Table S2.** Comparison of the key parameters of PCPs with gravimetric or volumetric CO<sub>2</sub> uptake similar with or higher than MAF-35.

**Fig. S3.** Thermogravimetry curve of **1**.

**Fig. S4.** PXRD patterns of **1** in different conditions.

**Fig. S5.** Pawley refinements of the PXRD patterns for **1'**.

**Fig. S6** N<sub>2</sub> sorption isotherms at 77 K.

**Fig. S7** H<sub>2</sub> sorption isotherms at 77 K.

**Fig. S8.** Sorption isotherms and Virial fitting of CO<sub>2</sub> and N<sub>2</sub> at 273 K and 298 K.

**Table S3.** The obtained Virial fitting parameters.

**Fig. S9.** Dual-site Langmuir–Freundlich fitting for CO<sub>2</sub> adsorption isotherms.

**Table S4.** The obtained Langmuir–Freundlich fitting parameters.

**Fig. 10** PXRD patterns of **1'** at 298 K in mixed CO<sub>2</sub>/N<sub>2</sub> flow with different CO<sub>2</sub> partial pressures.

**Fig. S11.** Pawley refinement results of the PXRD pattern for **1'** at CO<sub>2</sub>/N<sub>2</sub> (15:85, v/v).

**Fig. S12.** GCMC simulation result of the host-guest structure of **1**.

**Fig. S13** Repeated adsorption–desorption kinetics for **1'** under a mixed CO<sub>2</sub>/N<sub>2</sub> (15:85, v/v) flow at 25 °C and a pure N<sub>2</sub> flow at 50 °C and temperature swing adsorption–desorption kinetics for **1'** under a mixed CO<sub>2</sub>/N<sub>2</sub> (15:85, v/v) flow.

### References.

## Experimental details.

**Materials and General Methods.** Reagents and solvents were commercially available and used without further purification. The ligand benzodiimidazole ( $H_2bdim$ ) was synthesized from 1,2,4,5-benzotetramine, according to the literature procedure.<sup>S1</sup> IR spectra were obtained from KBr pellets on a Bruker Tensor 27 FT-IR spectrometer in the 400–4000  $cm^{-1}$  region. Elemental analyses (C, H, N) were performed with a Vario EL elemental analyzer. Powder X-ray diffraction (PXRD) patterns were recorded using a Bruker D8 ADVANCE X-ray powder diffractometer ( $Cu\ K\alpha$ ) at room temperature except otherwise stated. The composition of  $CO_2/N_2$  gas mixture was controlled by two mass flowmeters with a total flow rate 100  $mL\ min^{-1}$ . Thermogravimetry analyses were performed using a TA Q50 instrument with a heating rate of 5.0  $^{\circ}C/min$  under nitrogen. Gas sorption isotherms were measured with a Micromeritics ASAP 2020M instrument. Before the sorption experiments, the as-synthesized samples were placed in the sample tubes and dried under high vacuum at 70  $^{\circ}C$  for 12 h.

**Synthesis.** Single crystals of  $[Cu_2(\mu-OH)_2(bdim)]\cdot 5.4H_2O$  (**1**) and  $[Cu_2(\mu-OCH_3)_2(bdim)]\cdot C_6H_6$  (**2**). A solution of  $H_2bdim$  ( $1\times 10^{-5}$  mol) in MeOH (1.0 mL) was slowly and carefully layered onto a solution of  $[Cu(NH_3)_2]OH$  ( $1\times 10^{-5}$  mol) in aqueous ammonia/methanol (1/1, 1 mL), where benzene (2 mL) was placed between the two layers. After about 4 months, dark-green crystals of **1** and **2** were obtained by manual selection.

Bulk microcrystalline powder of **1**. MeOH (20 mL) was poured into an aqueous NaOH (6 mol/L, 20 mL) solution of  $Cu(OH)_2$  (0.18 g, 1.85 mmol) and stirred for several minutes to give a brownish suspension. Then a solution of  $H_2bdim$  (0.15 g, 0.95 mmol) in methanol/benzene (1/1, 40 mL) was dropwise added in 12 hrs. After the suspension was stirred for 5 days, the mixture was filtered and successively washed by  $H_2O$  and MeOH twice, then successively soaked in MeOH and  $H_2O$  for two days, and at last filtered to give the product (yield: 85%). Anal. Calcd (%) for  $[Cu_2(\mu-OH)_2(bdim)]\cdot 5.4H_2O$  ( $C_8H_{16.8}Cu_2N_4O_{7.4}$ ): C, 23.18; H, 4.08; N, 13.52. Found:

C, 23.25; H, 4.05; N, 13.42. IR (cm<sup>-1</sup>, KBr): 3621(m), 3413(s, br), 1610(m), 1491(s), 1469(s), 1372(s), 1237(s), 1191(m), 1164(m), 854(m), 836(m), 639(m), 484(m), 429(m).

**Crystal Structure Determination.** Diffraction data of **1** and **2** were collected on a Bruker Apex and an Oxford Diffraction CCD diffractometer with graphite-monochromated Mo and Cu K $\alpha$  radiation, respectively. Absorption corrections were applied by using multi-scan program SADABS and PROCESS-AUTO. The structures were solved with the direct method and refined with a full-matrix least-squares technique with the SHELXTL program package. Anisotropic thermal parameters were applied to all non-hydrogen atoms. The hydrogen atoms were generated geometrically. Crystal data as well as details of data collection and refinements for the complexes are summarized in Table S1. CCDC 956255-956256 contain the supplementary crystallographic data for this paper. These data can be obtained free of charge from The Cambridge Crystallographic Data Centre via [www.ccdc.cam.ac.uk/data\\_request/cif](http://www.ccdc.cam.ac.uk/data_request/cif).

**Pawley Refinement Details.** The powder X-ray diffraction data were collected with a scanning speed of 0.02 °/step and 2 sec/step. Indexing and Pawley refinement of the PXRD patterns were carried out by using the Reflex module of Material Studio 5.0. The patterns were indexed by the X-cell method with the aid of unit-cell parameters from single-crystal data. Pawley refinements were carried out with the cell parameters obtained from indexing in space group *C2/m* and *P2<sub>1</sub>/m*. Peak profiles, zero-shift, background, and unit-cell parameters were refined simultaneously. The peak profiles were refined by the Pseudo-Voigt function with Berar-Baldinozzi asymmetry correction parameters. The background was refined with a 20th-order polynomial.

**Computational details.** In this work, all the GCMC (Grand Canonical Monte Carlo) simulations were performed in the sorption modules of the Materials studio 5.0 package. Before the simulations, the model structures from the X-ray diffraction data (including both the *C2/m* and the *P2<sub>1</sub>/m* lattice) were geometrically optimized by fixing the cell parameters by using the spin polarization density functional theory

(DFT) on the basis of generalized gradient approximation (GGA) with the Perdew–Burke–Ernzerhof (PBE) function. The double numerical plus polarization (DNP) basis and the DFT semi-core pseudopotentials (DSPP) were adopted. As the Cu(II) ion has unpaired electron, we set the multiplicity of the system as auto, and then the program would attempt to determine the ground spin state through a spin-unrestricted calculation. The atomic partial charges in the frameworks were calculated after the optimizations by using the Mulliken population analysis. However, the Mulliken charges for the Cu(II) ions were apparently too low to simulate the accurate adsorption properties of the frameworks, so we directly took the CBAC (connectivity-based atom contribution) charge for Cu, which were developed by Zhong et al.<sup>S2</sup>

CO<sub>2</sub> was also optimized using the same method (the C=O bond length is 1.177 Å) but adopted the ESP fitted charge ( $q_{\text{O}} = -0.29e$  and  $q_{\text{C}} = 0.581e$ ). For all the GCMC simulations, the simulation box was set with 8 ( $2 \times 2 \times 2$ ) unit cells while all the frameworks and the CO<sub>2</sub> molecule were considered to be rigid and described by the universal forcefield (UFF). The cutoff distance was set to 18.5 Å for the Lennard-Jones (LJ) interactions, the electrostatic interactions and the van der Waals interactions were handled using the Ewald and Atom based summation method, respectively. The favorable adsorption sites were simulated by the fixed loading task and Metropolis method at 298 K. The loading steps, equilibration steps and the production steps were all set to  $1.0 \times 10^7$ . The saturation/maximum uptakes were modeled at 298 K using the fixed pressure task and Metropolis method with  $2.0 \times 10^7$  equilibration steps, followed by  $2.0 \times 10^7$  production steps for computing the ensemble averages.

### Calculation of isosteric heat of adsorption ( $Q_{st}$ ).

Dual-site Langmuir–Freundlich equation<sup>5d</sup>

$$n = \frac{n_{L,A} \times b_A \times p^{1/t_A}}{1 + b_A \times p^{1/t_A}} + \frac{n_{L,B} \times b_B \times p^{1/t_B}}{1 + b_B \times p^{1/t_B}}$$

Where there are two distinct adsorption sites A and B,  $n$  is amount adsorbed,  $n_L$  is amount adsorbed at saturation,  $p$  is pressure,  $b$  and  $t$  are constants.

The Clausius–Clapeyron equation<sup>S3</sup> was employed to calculate the enthalpies of CO<sub>2</sub> adsorption:

$$\left[ \frac{\partial \ln p}{\partial (1/T)} \right]_n = -\frac{Q_{st}}{R}$$

Where  $p$  is the pressure,  $n$  is the amount adsorbed,  $T$  is the temperature,  $R$  is the universal gas constant.

### Calculation of CO<sub>2</sub>/N<sub>2</sub> selectivities.<sup>12</sup>

Virial fitting equation

$$\ln p = \ln n + a_0 + a_1 n + a_2 n^2 + a_3 n^3 \dots$$

where  $p$  is pressure,  $n$  is amount adsorbed,  $T$  is temperature, and  $a_0$ ,  $a_1$  etc. are Virial coefficients.  $a_0$  is related to adsorbate–adsorbent interactions, whereas  $a_1$  describes adsorbate–adsorbate interactions. The Henry's Law constant ( $K_H$ ) is equal to  $\exp(-a_0)$ .

The Henry's Law selectivity for gas component  $i$  over  $j$  is calculated based on the following equation.

$$S_{ij} = \frac{K_{Hi}}{K_{Hj}}$$

**Table S1.** Crystallographic data and structure refinement results.

| Complex                                                          | <b>1</b>                                                                         | <b>2</b>                                                                      |
|------------------------------------------------------------------|----------------------------------------------------------------------------------|-------------------------------------------------------------------------------|
| Formula                                                          | C <sub>8</sub> H <sub>16.8</sub> Cu <sub>2</sub> N <sub>4</sub> O <sub>7.4</sub> | C <sub>16</sub> H <sub>16</sub> Cu <sub>2</sub> N <sub>4</sub> O <sub>2</sub> |
| Formula weight                                                   | 414.53                                                                           | 423.41                                                                        |
| Temperature (K)                                                  | 150(2)                                                                           | 128(2)                                                                        |
| Crystal system                                                   | Monoclinic                                                                       | Monoclinic                                                                    |
| Space group                                                      | <i>P</i> 2 <sub>1</sub> / <i>m</i>                                               | <i>C</i> 2/ <i>m</i>                                                          |
| <i>a</i> (Å)                                                     | 10.7521(8)                                                                       | 16.377(3)                                                                     |
| <i>b</i> (Å)                                                     | 11.7077(7)                                                                       | 12.209(2)                                                                     |
| <i>c</i> (Å)                                                     | 12.344(1)                                                                        | 10.268(2)                                                                     |
| $\beta$ (°)                                                      | 92.146(7)                                                                        | 127.226(2)                                                                    |
| <i>V</i> (Å <sup>3</sup> )                                       | 1552.8(2)                                                                        | 1634.8(5)                                                                     |
| <i>Z</i>                                                         | 4                                                                                | 4                                                                             |
| <i>D</i> <sub>c</sub> (g cm <sup>-3</sup> )                      | 1.773                                                                            | 1.720                                                                         |
| <i>R</i> <sub>1</sub> [ <i>I</i> > 2σ( <i>I</i> )] <sup>a</sup>  | 0.0946                                                                           | 0.0385                                                                        |
| <i>wR</i> <sub>2</sub> [ <i>I</i> > 2σ( <i>I</i> )] <sup>b</sup> | 0.2790                                                                           | 0.0929                                                                        |
| <i>R</i> <sub>1</sub> (all data)                                 | 0.1011                                                                           | 0.0552                                                                        |
| <i>wR</i> <sub>2</sub> (all data)                                | 0.2837                                                                           | 0.1009                                                                        |
| GOF                                                              | 1.046                                                                            | 1.028                                                                         |

<sup>a</sup>  $R_1 = \sum ||F_o| - |F_c|| / \sum |F_o|$ .

<sup>b</sup>  $wR_2 = [\sum w(F_o^2 - F_c^2)^2 / \sum w(F_o^2)^2]^{1/2}$ .

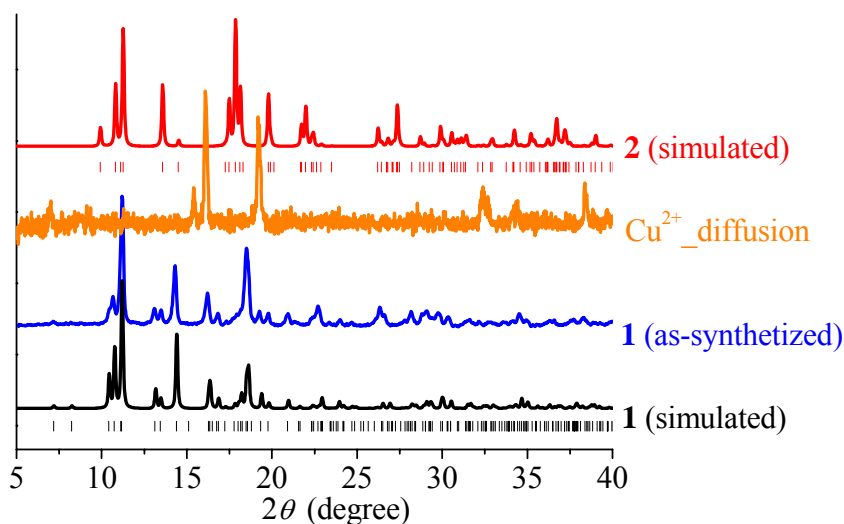

**Fig. S1** PXRD patterns of solid samples obtained by different reaction methods.

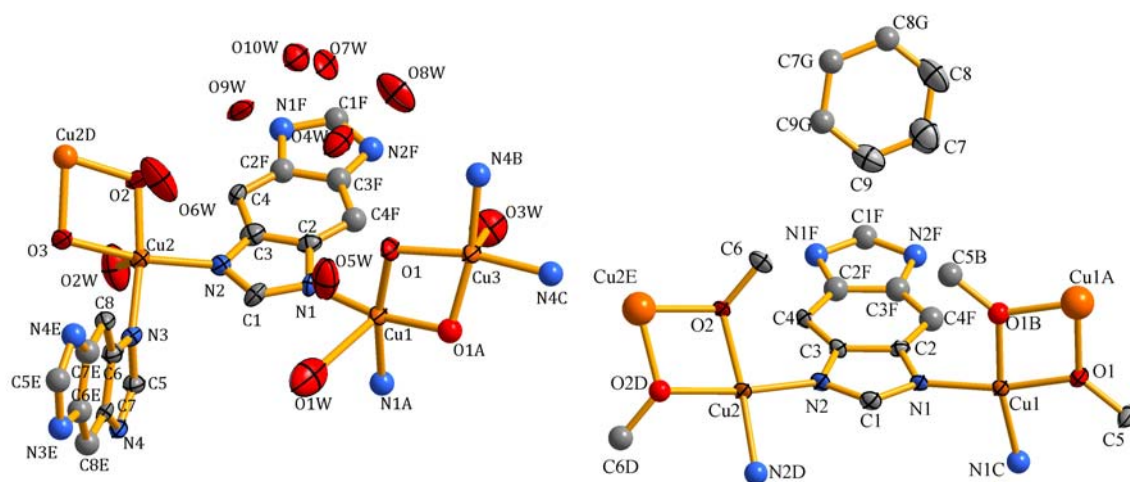

**Fig. S2** The coordination environments of **1** (left, symmetric codes: A:  $x, 3/2-y, z$ ; B:  $-1+x, y, z$ ; C:  $-1+x, 3/2-y, z$ ; D:  $x, 1/2-y, z$ ; E:  $2-x, 1-y, 2-z$ ; F:  $1-x, 1-y, 1-z$ ) and **2** (right, symmetric codes: A:  $1-x, y, 2-z$ ; B:  $1-x, 1-y, 2-z$ ; C:  $x, 1-y, z$ ; D:  $1-x, y, 1-z$ ; E:  $1-x, -y, 1-z$ ; F:  $1/2-x, 1/2-y, 1-z$ ; G:  $x, -y, z$ ) (hydrogen atoms are omitted for clarity). In **1**, besides Cu1 and Cu3, O2 and O3 also lie on a mirror plane in the framework. Furthermore, a two-fold screw axis across the centre of the ligand  $\text{bdim}^{2-}$ . Moreover, Cu2 and O1 in **2** also lie on a two-fold axis and the centre of the ligand  $\text{bdim}^{2-}$  lies across a two-fold screw axis. Cu1 and O<sub>2</sub> lie on a mirror plane and benzene of solvation lies across a mirror plane.



**Table S2.** Comparison of the key parameters of PCPs with gravimetric or volumetric CO<sub>2</sub> uptake similar with or higher than MAF-35. Note: the values higher than those of MAF-35 were highlighted in bold.

| Compound <sup>a</sup><br>(common name) | $Q_{st}$<br>(kJ/mol)     | $\rho$<br>(g mL <sup>-1</sup> ) | CO <sub>2</sub> uptake<br>at 298 K and 1 atm |                         | Concentration of<br>active sites |                     | Type of<br>active sites <sup>h</sup> | Reference        |
|----------------------------------------|--------------------------|---------------------------------|----------------------------------------------|-------------------------|----------------------------------|---------------------|--------------------------------------|------------------|
|                                        |                          |                                 | wt %                                         | g L <sup>-1</sup>       | mol kg <sup>-1</sup>             | mol L <sup>-1</sup> |                                      |                  |
| mme-Mg <sub>2</sub> (dobpdc)           | <b>71<sup>b</sup></b>    | 0.750                           | 17.0                                         | 128                     | 5.0                              | 3.7                 | OMS+LBS                              | 5d               |
| CAU-1                                  | <b>48<sup>c</sup></b>    | 0.892                           | 17.6                                         | 157                     | 3.7                              | 3.3                 | LBS                                  | S4               |
| Mg <sub>2</sub> (dobdc)                | <b>47<sup>d</sup></b>    | 0.920                           | <b>35.2<sup>#1</sup></b>                     | <b>324<sup>#1</sup></b> | 8.2                              | 7.6                 | OMS                                  | 6b               |
| <b>MAF-35</b>                          | <b>47<sup>b, e</sup></b> | <b>1.357</b>                    | <b>19.6</b>                                  | <b>266</b>              | <b>12.6</b>                      | <b>17.2</b>         | <b>OMS</b>                           | <b>This work</b> |
| bio-MOF-11                             | 45 <sup>c</sup>          | 1.234                           | 17.9                                         | 221                     | 7.9                              | 9.8                 | LBS                                  | 4g               |
| rht-MOF-7                              | 45 <sup>f</sup>          | 0.783                           | 17.2                                         | 135                     | 11.2                             | 8.8                 | OMS+LBS                              | S5               |
| Mg <sub>2</sub> (dobpdc)               | 44 <sup>b</sup>          | 1.073                           | <b>22.0</b>                                  | 236                     | 3.3                              | 3.5                 | OMS                                  | 5d               |
| Cu-TDPAT                               | 42 <sup>g</sup>          | 0.782                           | <b>25.9</b>                                  | 202                     | 11.2                             | 8.8                 | OMS+LBS                              | 4i               |
| Ni <sub>2</sub> (dobdc)                | 41 <sup>c</sup>          | 1.194                           | <b>25.6<sup>#1</sup></b>                     | <b>306<sup>#1</sup></b> | 6.4                              | 7.6                 | OMS                                  | 6b               |
| Zn <sub>2</sub> (ox)(atz)              | 41 <sup>e</sup>          | <b>1.713</b>                    | 14.3 <sup>#2</sup>                           | 245 <sup>#2</sup>       | 5.3                              | 9.1                 | LBS                                  | 4f               |
| Co <sub>2</sub> (dobdc)                | 37 <sup>d</sup>          | 1.177                           | <b>30.6<sup>#1</sup></b>                     | <b>360<sup>#1</sup></b> | 6.4                              | 7.6                 | OMS                                  | 6b               |
| HKUST-1                                | 35 <sup>e</sup>          | 0.879                           | 18.4                                         | 162                     | 4.9                              | 4.3                 | OMS                                  | S6               |
| [Cu(Me-4py-trz-ia)]                    | 30 <sup>d</sup>          | 0.928                           | <b>26.8</b>                                  | 249                     | 7.7                              | 7.1                 | OMS+LBS                              | S7               |
| PCN-88                                 | 27 <sup>g</sup>          | 0.657                           | 18.5 <sup>#1</sup>                           | 122 <sup>#1</sup>       | 3.3                              | 2.2                 | OMS                                  | 14               |
| MAF-66                                 | 26 <sup>g</sup>          | 1.128                           | 19.4                                         | 219                     | 8.6                              | 9.8                 | LBS                                  | 12               |
| Cu-TPBTM                               | 26 <sup>g</sup>          | 0.627                           | <b>23.3</b>                                  | 146                     | 7.0                              | 4.4                 | OMS+LBS                              | 4j               |

<sup>a</sup> mme = N,N'-dimethylethylenediamine; BTri = 1,3,5-tris(1H-1,2,3,-triazol-5-yl)benzene; dobpdc = 4,4'-dioxido-3,3'-biphenyldicarboxylate; dobdc = 2,5-dioxido-1,4-benzenedicarboxylate; TDPAT = 2,4,6-tris(3,5-dicarboxylphenyl-amino)-1,3,5-triazine; ox = oxalate; atz = 3-amino- 1,2,4-triazole; Me-4py-trz-ia = 5-(3-methyl-5-(pyridine-4-yl)-(4H-1,2,4-triazol-4-yl)iso-phthalate); TPBTM = N,N',N''-tris(isophthalyl)-1,3,5- benzenetricarboxamide.

<sup>b</sup> Obtained by the Clausius–Clapeyron equation and dual-sites Langmuir–Freundlich fitting.

<sup>c</sup> Obtained by the Clausius–Clapeyron equation and Langmuir–Freundlich fitting.

<sup>d</sup> Obtained by the Clausius–Clapeyron equation and Toth model fitting.

<sup>e</sup> Obtained by the Clausius–Clapeyron equation without mathematical fitting.

<sup>f</sup> Obtained by the Clausius–Clapeyron equation and dual-sites Langmuir fitting.

<sup>g</sup> Obtained by the Virial fitting method.

<sup>#1</sup> 296 K; <sup>#2</sup> 293 K.

<sup>h</sup> LBS = Lewis basic site.

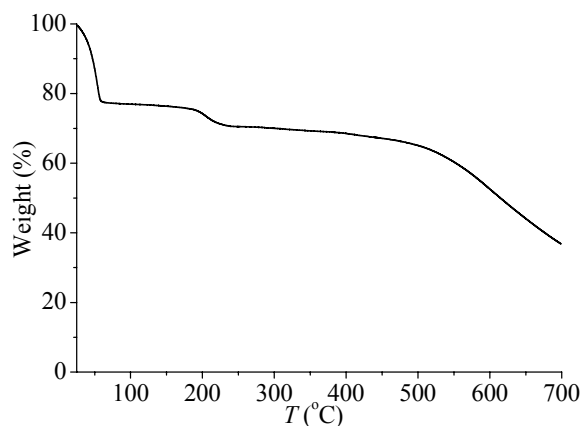

**Fig. S3** Thermogravimetry curve of **1**.

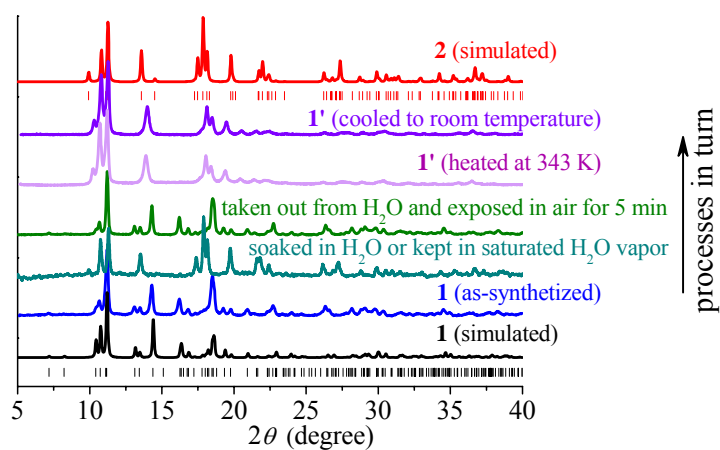

**Fig. S4** PXRD patterns of **1** at different conditions.

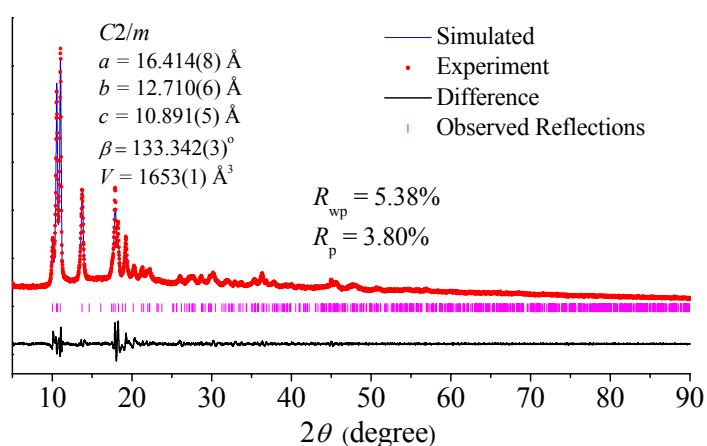

**Fig. S5** Pawley refinement results of the PXRD pattern for **1'**. The obtained unit-cell parameters are similar to those of **2** [ $C2/m$ ,  $a = 16.377(3) \text{ \AA}$ ,  $b = 12.209(2) \text{ \AA}$ ,  $c = 10.268(2) \text{ \AA}$ ,  $\beta = 127.226(2)^\circ$ ,  $V = 1634.8(5) \text{ \AA}^3$ ].

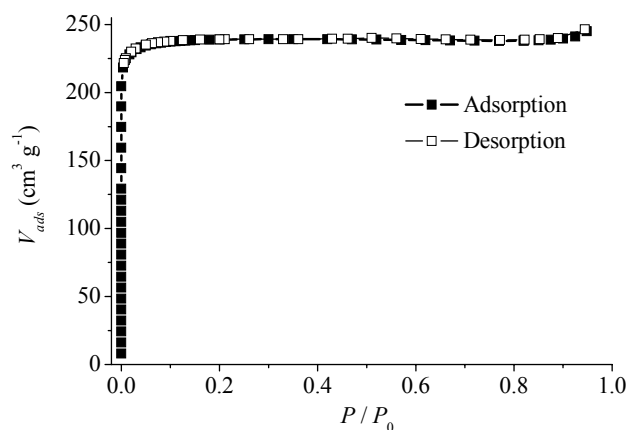

**Fig. S6** N<sub>2</sub> sorption isotherms at 77 K.

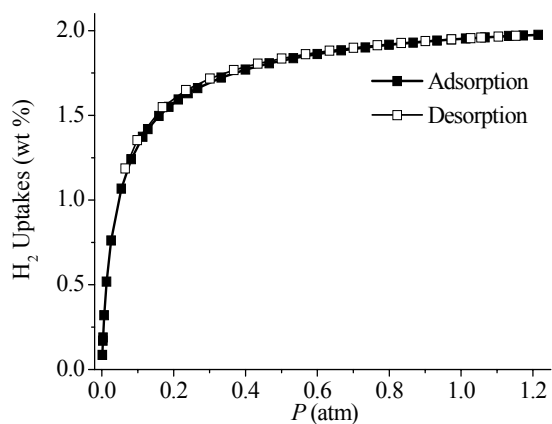

**Fig. S7** H<sub>2</sub> sorption isotherms at 77 K.

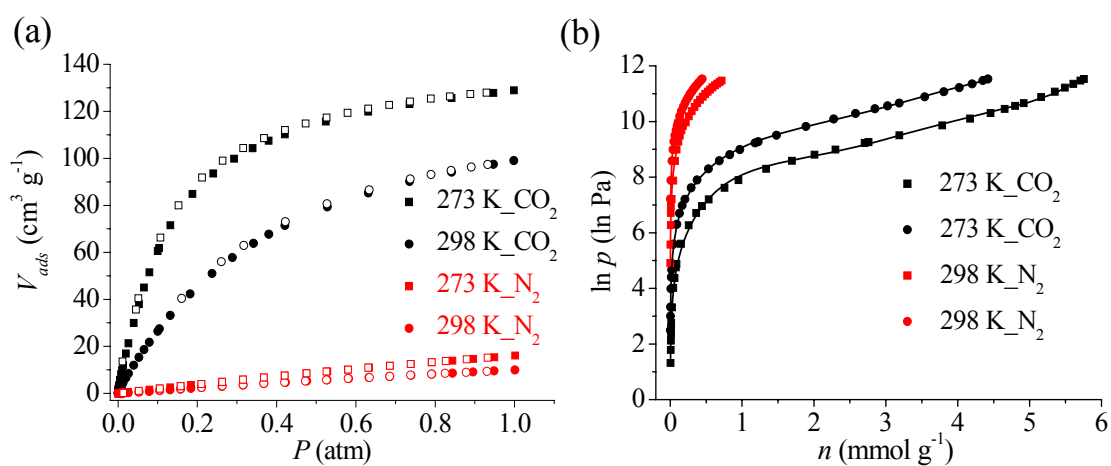

**Fig. S8** (a) CO<sub>2</sub> and N<sub>2</sub> (adsorption: solid, desorption: open) isotherms measured at 273 K and 298 K, and (b) Virial fitting (lines).

**Table S3.** Virial fitting parameters obtained in Fig. S8b.

|                       | CO <sub>2</sub> |                | N <sub>2</sub> |                |
|-----------------------|-----------------|----------------|----------------|----------------|
| <i>T</i> (K)          | 273             | 298            | 273            | 298            |
| <i>R</i> <sup>2</sup> | 0.9989          | 0.9997         | 0.9963         | 0.9851         |
| <i>a</i> <sub>0</sub> | 6.8907±0.0346   | 8.5322±0.0154  | 11.2281±0.0431 | 12.2930±0.0519 |
| <i>a</i> <sub>1</sub> | 2.8659±0.2325   | 1.0260±0.0848  | 1.4758±0.3520  | -0.0511±0.2085 |
| <i>a</i> <sub>2</sub> | -2.4713±0.3122  | -0.6716±0.0975 | -0.9770±0.5172 | —              |
| <i>a</i> <sub>3</sub> | 0.9476±0.1532   | 0.1991±0.0365  | —              | —              |
| <i>a</i> <sub>4</sub> | -0.1610±0.0310  | -0.0186±0.0043 | —              | —              |
| <i>a</i> <sub>5</sub> | 0.0102±0.0022   | —              | —              | —              |

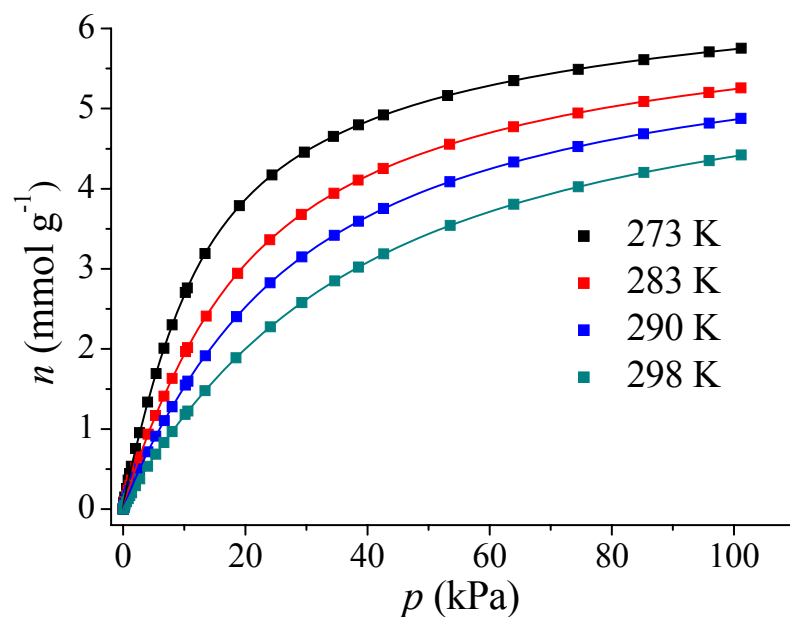

**Fig. S9** Dual-site Langmuir–Freundlich fitting (lines) for CO<sub>2</sub> adsorption isotherm (points) measured at different temperatures.

**Table S4.** Langmuir–Freundlich fitting parameters obtained in Fig. S7.

| $T$ (K)   | 273                 | 283                 | 290                 | 298                 |
|-----------|---------------------|---------------------|---------------------|---------------------|
| $R^2$     | 0.999999            | 0.999999            | 0.999999            | 0.999999            |
| $n_{L,A}$ | $4.8635 \pm 0.0471$ | $4.6857 \pm 0.0880$ | $4.5253 \pm 0.1140$ | $4.7064 \pm 0.1474$ |
| $b_A$     | $0.0862 \pm 0.0003$ | $0.0592 \pm 0.0006$ | $0.0467 \pm 0.0008$ | $0.0330 \pm 0.0008$ |
| $t_A$     | $1.2986 \pm 0.0087$ | $1.2161 \pm 0.0100$ | $1.1866 \pm 0.0093$ | $1.1302 \pm 0.0081$ |
| $n_{L,B}$ | $2.1420 \pm 0.0561$ | $1.9618 \pm 0.0914$ | $1.9008 \pm 0.1079$ | $1.4972 \pm 0.1292$ |
| $b_B$     | $0.0194 \pm 0.0007$ | $0.0119 \pm 0.0006$ | $0.0081 \pm 0.0005$ | $0.0044 \pm 0.0004$ |
| $t_B$     | $0.5932 \pm 0.0059$ | $0.6310 \pm 0.0092$ | $0.6485 \pm 0.0106$ | $0.6315 \pm 0.0148$ |

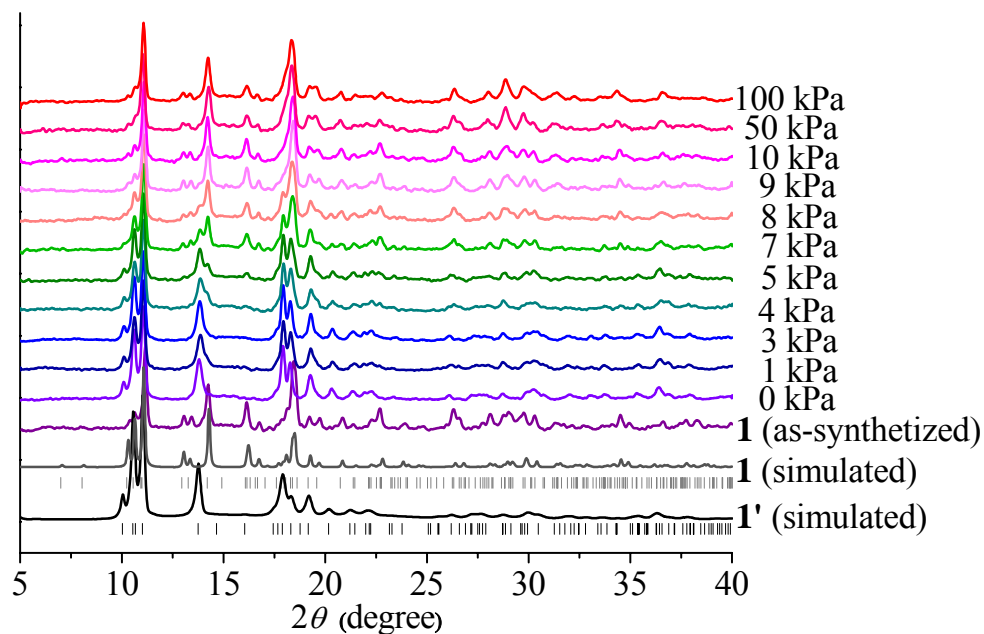

**Fig. 10** PXRD patterns of **1'** at 298 K in mixed CO<sub>2</sub>/N<sub>2</sub> flow with different CO<sub>2</sub> partial pressures.

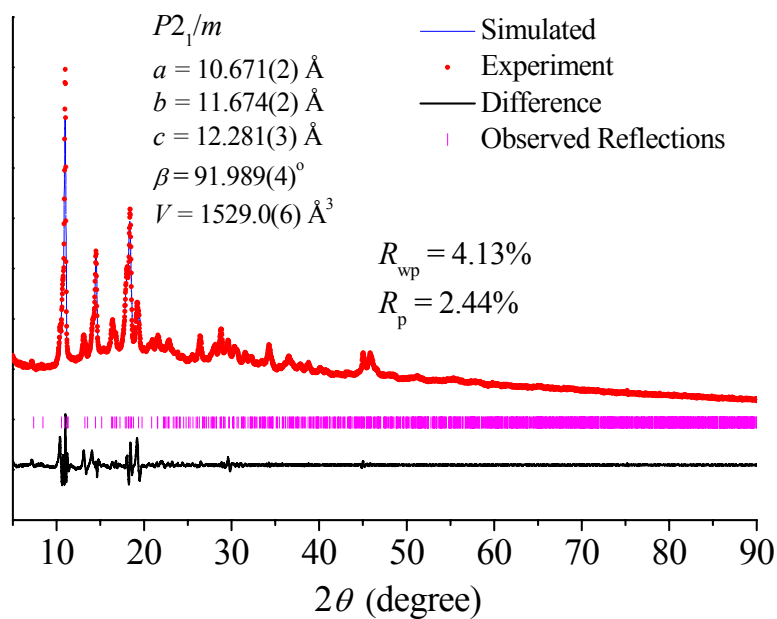

**Fig. S11** Pawley refinement results of the PXRD pattern for **1'** at CO<sub>2</sub>/N<sub>2</sub> (15:85, v/v). The obtained unit-cell parameters are similar to those of **1** [ $P2_1/m$ ,  $a = 10.7521(8) \text{ \AA}$ ,  $b = 11.7077(7) \text{ \AA}$ ,  $c = 12.344(1) \text{ \AA}$ ,  $\beta = 92.146(7)^\circ$ ,  $V = 1552.8(2) \text{ \AA}^3$ ].

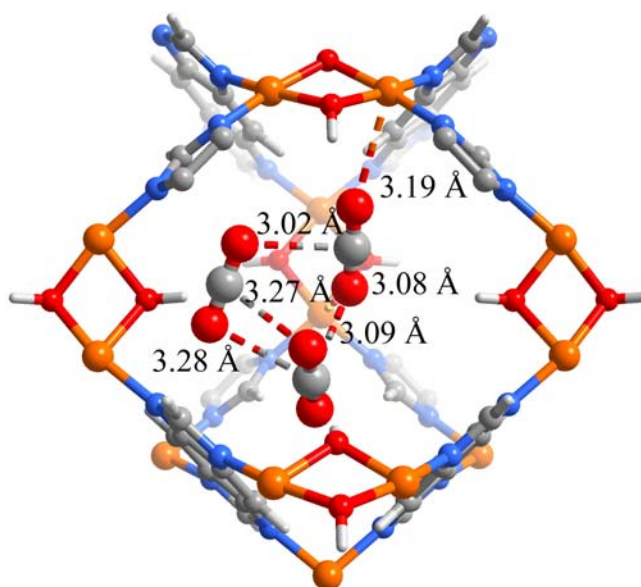

**Fig. S12** GCMC simulation result of the host-guest structure of **1** at 298 K and 1 atm.

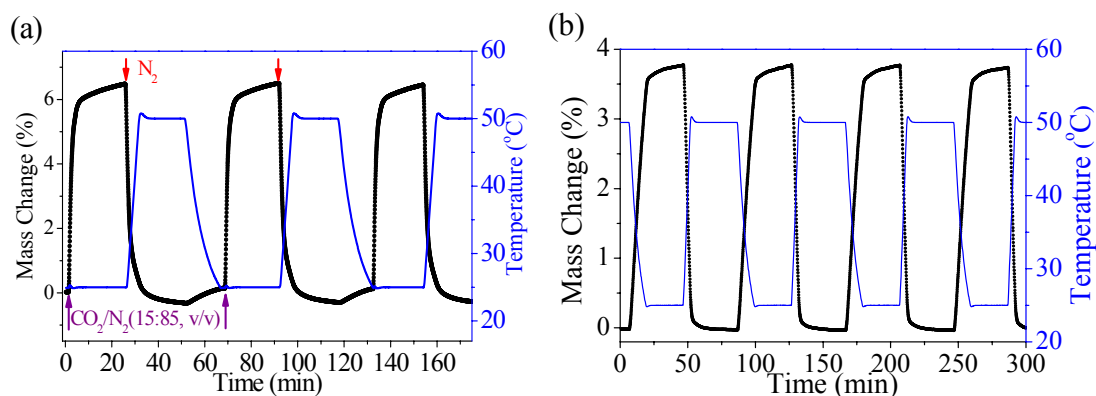

**Fig. S13** (a) Repeated adsorption–desorption kinetics for **1'** under a mixed CO<sub>2</sub>/N<sub>2</sub> (15:85, v/v) flow at 25 °C and a pure N<sub>2</sub> flow at 50 °C. (b) Temperature swing adsorption–desorption kinetics for **1'** under CO<sub>2</sub>/N<sub>2</sub> (15:85, v/v) mixture gas.

## References

- (S1) J. Ariant, J. Marhan and H. Taeublova, *Collect. Czech. Chem. Commun.*, 1960, **25**, 1602.
- (S2) Q. Xu and C. Zhong, *J. Phys. Chem. C*, 2010, **114**, 5035.
- (S3) L. Czepirski and J. Jagiello, *Chem. Eng. Sci.*, 1989, **44**, 797.
- (S4) X. Si, C. Jiao, F. Li, J. Zhang, S. Wang, S. Liu, Z. Li, L. Sun, F. Xu, Z. Gabelica and C. Schick, *Energy Environ. Sci.*, 2011, **4**, 4522.
- (S5) R. Luebke, J. F. Eubank, A. J. Cairns, Y. Belmabkhout, L. Wojtas and M. Eddaoudi, *Chem. Commun.*, 2012, **48**, 1455.
- (S6) Q. Min Wang, D. Shen, M. Bülow, M. Ling Lau, S. Deng, F. R. Fitch, N. O. Lemcoff and J. Semanscin, *Microporous and Mesoporous Mater.*, 2002, **55**, 217.
- (S7) D. Lassig, J. Lincke, J. Moellmer, C. Reichenbach, A. Moeller, R. Glaser, G. Kalies, K. A. Cychosz, M. Thommes, R. Staudt and H. Krautscheid, *Angew. Chem., Int. Ed.*, 2011, **50**, 10344.
